# Supplementary material for: Fabrication of recyclable reduced graphene oxide/graphitic carbon nitride quantum dot aerogel hybrids with enhanced photocatalytic activity
Source: Royal Society of Chemistry journal article supplement (doi:10.1039/d1ra06347b), 2021-01-01
Supplement: d1ra06347b1.pdf [file d1ra06347b1.pdf]

Support Information

## Fabrication of recyclable rGO/CNQDs aerogel hybrids with enhanced photocatalytic activity

Ping Zhao, Bo Jin\*, Jing Yan,, Rufang Peng\*

State Key Laboratory of Environment-friendly Energy Materials,  
School of Materials Science and Engineering,

Southwest University of Science and Technology, Mianyang 621010, Sichuan, P. R. China.

Correspondence: jinbo0428@163.com; rfpeng2006@163.com

### 1. Sample preparation

**Synthesis of CNQDs:** Briefly, urea and sodium citrate (18:1) were dissolved in 1.5 mL of deionized water, and kept it at 180 °C for 8 h. The product was purified with a 0.22  $\mu\text{m}$  filter membrane to remove the insoluble precipitate, and further diluted to 50 mL to prepare CNQDs suspensions ( $5.0 \text{ mg mL}^{-1}$ ).

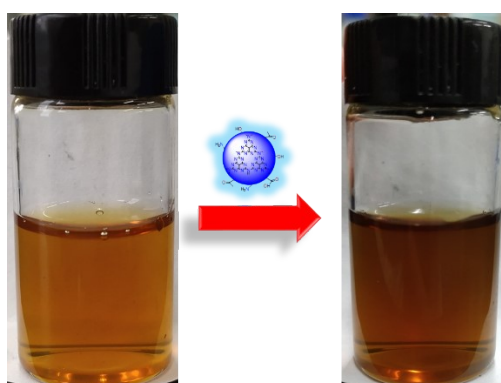

Fig. S1 The color change of graphene oxide

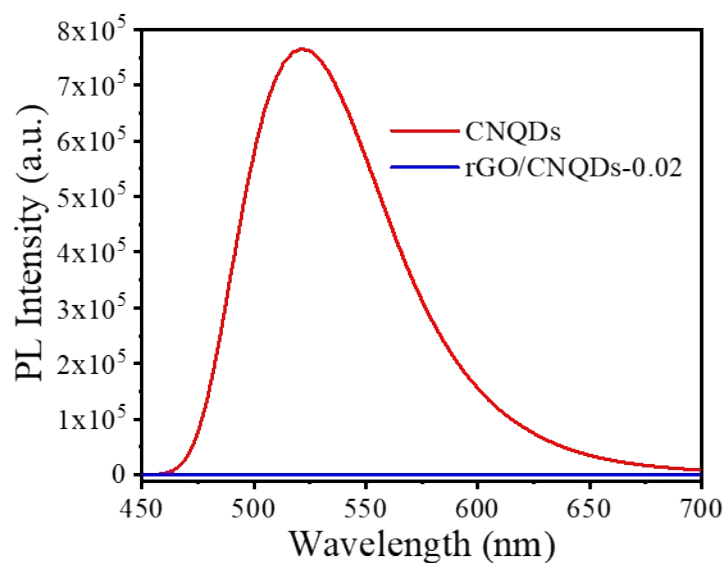

Fig. S2 PL emission spectra of as-prepare samples under excitation wavelength at 360 nm

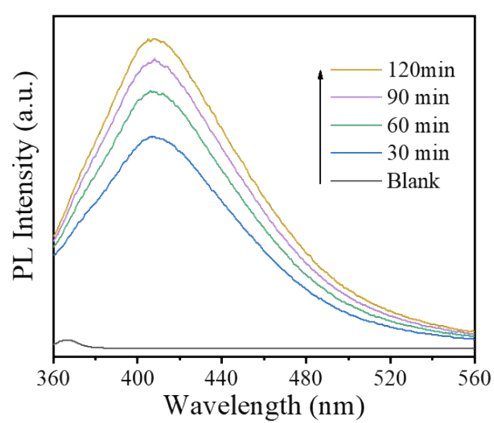

Fig. S3 PL spectral of TA solution in presence of rGO/CNQDs-0.02 under visible-light irradiation (excitation at 315 nm)
